# Supplementary material for: Quercetin manipulates the expression of genes involved in the reactive oxygen species (ROS) process in chicken heterophils
Source: PubMed Central journal article supplement — J Vet Med Sci. 2018 Jun 6;80(8):1204–11. doi: 10.1292/jvms.17-0112 (PMC6115250; doi:10.1292/jvms.17-0112), 2018-06-06
Supplement: jvms-80-1204-s001.pdf [file jvms-80-1204-s001.pdf]

## Supplementary information

**Suppl. Table S1.** Real-time quantitative RT–PCR primers

| Gene         | Accession No.  | Primer  | Sequence               | Annealing temp (°C) | Product size (bp) |
|--------------|----------------|---------|------------------------|---------------------|-------------------|
| <i>CYBB</i>  | NM_001100286   | Forward | TTGTCAAATGCCCAGCAGTG   | 60                  | 134               |
|              |                | Reverse | TCCACAGGCATTGAACAAGC   |                     |                   |
| <i>NCF1</i>  | NM_001030709   | Forward | ACCATCCGCAATGCAAAGAG   | 60                  | 121               |
|              |                | Reverse | TCTGCAAATTGCCCTCATG    |                     |                   |
| <i>NCF2</i>  | XM_004943279.1 | Forward | GTGGTAGCACAGTACAGTTACG | 60                  | 117               |
|              |                | Reverse | ATTGCATTGCCCTTCCAACC   |                     |                   |
| <i>NOX1</i>  | NM_001101830   | Forward | TTGCCAACAATGCAGCACTC   | 60                  | 104               |
|              |                | Reverse | TGAGAATTCTGTGTCCCACCTG |                     |                   |
| <i>CAT</i>   | NM_001031215   | Forward | GGCAACCCAATAGGAGATAAGC | 60                  | 141               |
|              |                | Reverse | TCCTTTCGCATGCACAACCTC  |                     |                   |
| <i>SOD1</i>  | NM_205064      | Forward | CATTTCTCTTACCGGACCACAC | 60                  | 123               |
|              |                | Reverse | AAACGAGGTCCAGCATTTC    |                     |                   |
| <i>RAC2</i>  | NM_001201452   | Forward | CTGTGAAGTACCTCGAATGCTC | 60                  | 114               |
|              |                | Reverse | ATGCTCGTTTCTTCGTTCCGG  |                     |                   |
| <i>IL6</i>   | NM_204628      | Forward | TGTTTCGCCTTTCAGACCTACC | 60                  | 123               |
|              |                | Reverse | TTATCACCATCTGCCGGATCG  |                     |                   |
| <i>CASP8</i> | NM_204592      | Forward | ACACATGTGGATGCAGATGC   | 60                  | 133               |
|              |                | Reverse | TGTTGTTGTGGTCCATGCAC   |                     |                   |
| <i>MCL1</i>  | NM_001257283   | Forward | GGCGTTAAAAAGCTGTTTCCG  | 60                  | 88                |
|              |                | Reverse | TTCCAGCGCTTCTCCATG     |                     |                   |
| <i>GAPDH</i> | NM_204305      | Forward | AAGGGCATCCTAGGACACAG   | 60                  | 107               |
|              |                | Reverse | TGGTCATTCAAGTGCAATGCC  |                     |                   |

**A**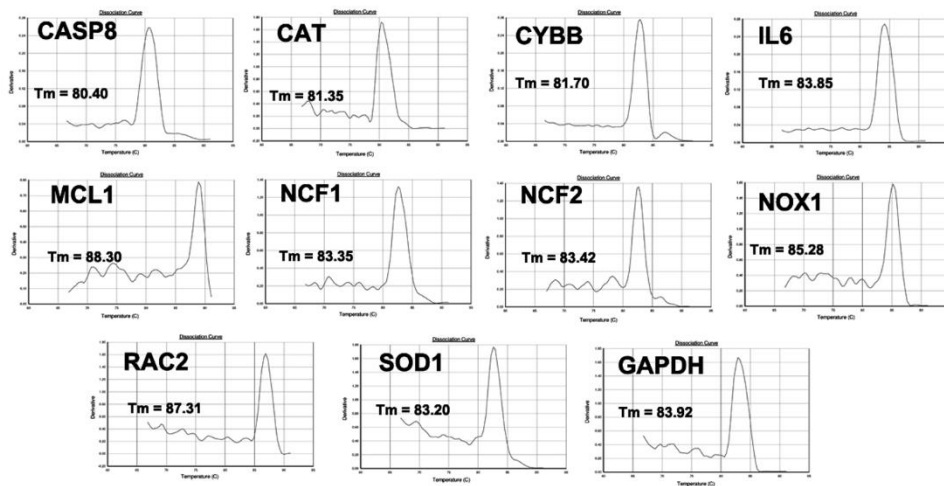**B**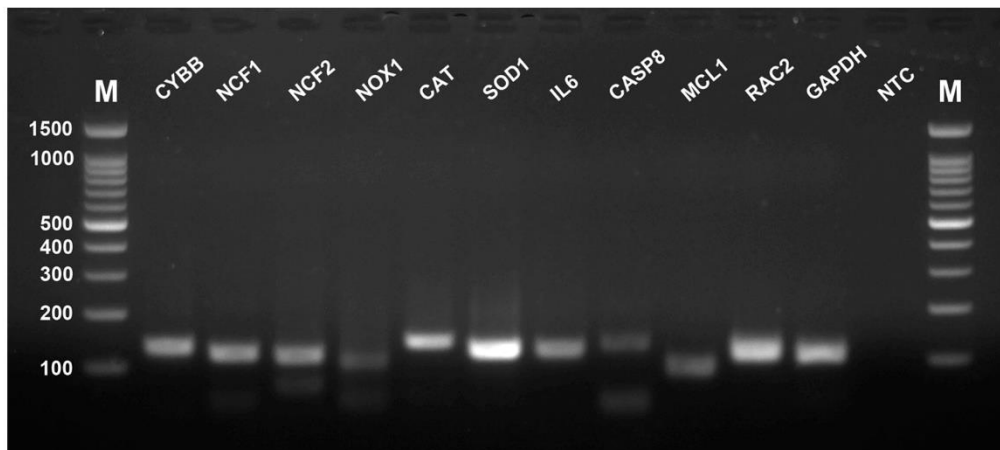**Suppl. Fig. S1**

(A) Representative peaks in the melting profile (dissociation curves) of genes by real-time PCR reactions in chicken heterophils. (B) Representative PCR products of expressing genes obtained from chicken heterophils using agarose gel electrophoresis and EtBr staining after real-time PCR. All PCR products had the correct size (see also Suppl. Table S1). *GAPDH* was used as a reference gene. NTC = no template control, M = 100 bp DNA marker.
